# Supplementary material for: The in situ decoration of Ti3C2 quantum dots on Cu nanowires for highly efficient electrocatalytic reduction of nitric oxide to ammonia
Source: Royal Society of Chemistry journal article supplement (doi:10.1039/d3qi01337e), 2023-01-01
Supplement: d3qi01337e1.pdf [file d3qi01337e1.pdf]

## **The *in-situ* decoration of Ti<sub>3</sub>C<sub>2</sub> quantum dots on Cu nanowires for high efficient electrocatalytic reduction of nitric oxide to ammonia**

Baojing Li<sup>a</sup>, Dongcai Shen<sup>a</sup>, Zhengting Xiao<sup>a,b</sup>, Quan Li<sup>a</sup>, Shuo Yao<sup>a</sup>, and Wentai Wang<sup>a\*</sup>

<sup>a</sup> Key Laboratory of Marine Chemistry Theory and Technology, Ministry of Education; College of Chemistry and Chemical Engineering, Ocean University of China, Qingdao, 266100, China. Email: [wentaiwang@ouc.edu.cn](mailto:wentaiwang@ouc.edu.cn)

<sup>b</sup> Key Laboratory of Biofuels, Qingdao Institute of Bioenergy and Bioprocess Technology, Chinese Academy of Sciences, Qingdao 266101, PR China

## 1. Determination of NH<sub>3</sub>

The ammonia produced in the electrocatalytic NORR process was determined by UV-vis spectrophotometry with indophenol blue method. Specifically, 2 mL of solution after NORR test is added to 2 mL of 1.0 M NaOH solution (containing 5 wt% salicylic acid and 5 wt% sodium citrate), 1 mL of 0.05 M NaClO and 0.2 mL of 1 wt% C<sub>5</sub>FeN<sub>6</sub>Na<sub>2</sub>O are added, and the absorption spectrum of UV-vis tested after the solution was kept away from light for 2 hours in the greenhouse. The concentration of indophenol blue was measured at the wavelength of 655 nm in the absorption spectrum. The concentration absorption peak curve is calibrated with a series of standard NH<sub>4</sub>Cl (aq) of different concentrations. The standard curve obtained by indophenol blue method is  $y=0.37131x+0.04886$ ,  $R^2=0.9996$ , as shown in the figure.

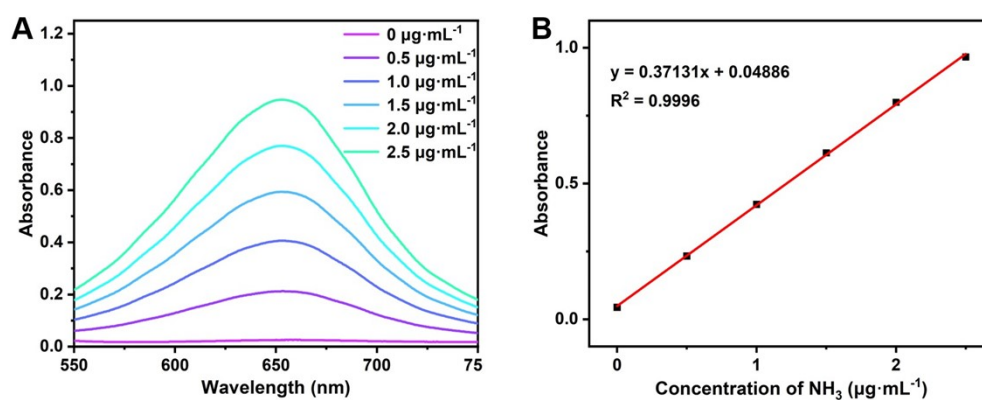

**Fig. S1.** (A) UV-vis absorption spectra of indole phenol determination at different concentrations of NH<sub>4</sub><sup>+</sup> at room temperature after 2 hours of avoiding light. (B) Calibration curve for estimating NH<sub>4</sub><sup>+</sup> concentration.

## 2. Determination of $\text{N}_2\text{H}_4$

$\text{N}_2\text{H}_4$  was determined by UV-vis using the method reported by Watt and Christp. Mix 0.599 g  $\text{C}_9\text{H}_{11}\text{NO}$ , 3 mL HCl and 30 mL  $\text{C}_2\text{H}_5\text{OH}$  as color developing agent for standby. Specifically, take 2 mL of experimental solution from the NORR electrolytic cell, add 2 mL of developer, mix it at room temperature for 15 minutes, and then conduct UV-vis analysis at 455 nm to test the absorbance of the obtained solution. Configure  $\text{N}_2\text{H}_4$  measurement working curves with different concentrations to obtain the relationship between  $\text{N}_2\text{H}_4$  with different concentrations and absorbance:  $y=0.77471x+0.02014$ ,  $R^2=0.997$ .

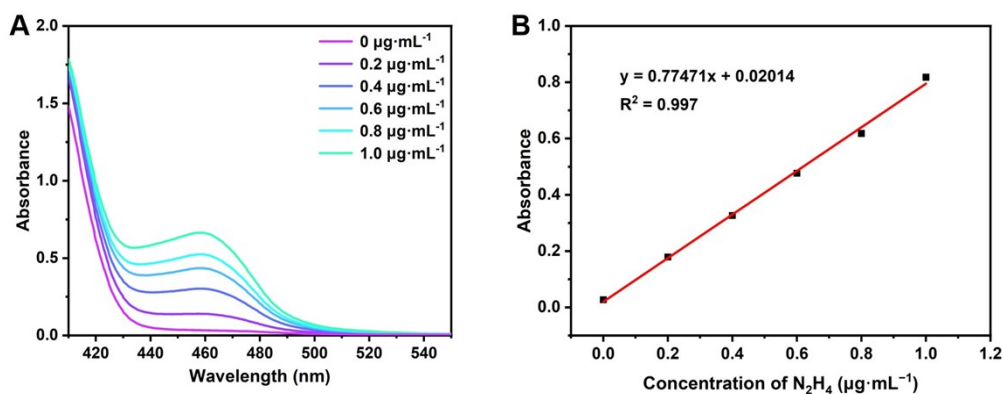

**Fig. S2.** (A) UV-vis absorption spectra measured after 20 minutes at different  $\text{N}_2\text{H}_4$  concentrations at room temperature. (B) Calibration curve for estimating  $\text{N}_2\text{H}_4$  concentration.

## 3. Determination of $\text{H}_2$

Determination of gas phase product  $\text{H}_2$  by gas chromatography.

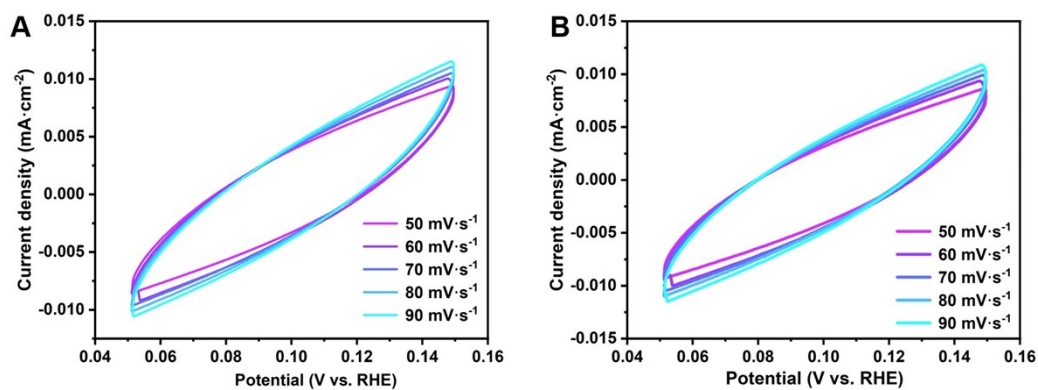

**Fig. S3** The CV curves of (A) Cu NWs and (B) Ti<sub>3</sub>C<sub>2</sub> QDs/Cu NWs at different scanning rates (50, 60, 70, 80, 90 mV/s).

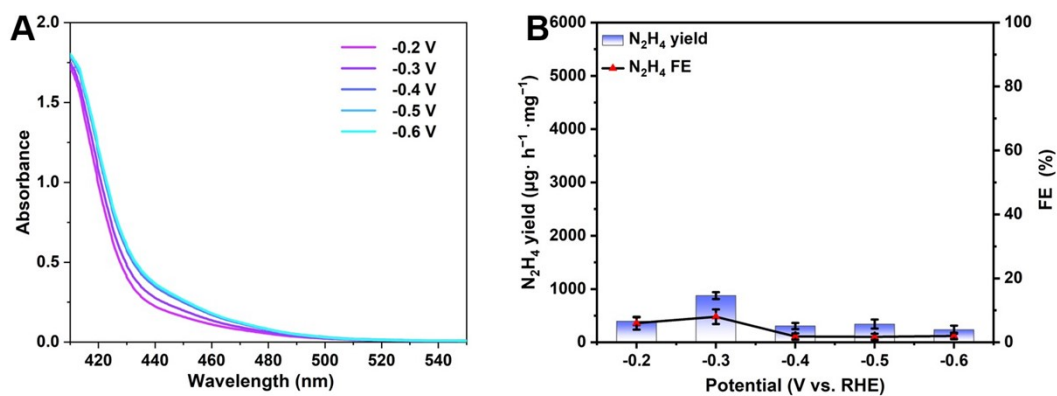

**Fig. S4.** The UV-vis absorption spectra of N<sub>2</sub>H<sub>4</sub> were produced at Ti<sub>3</sub>C<sub>2</sub> QDs/Cu NWs at different potentials.

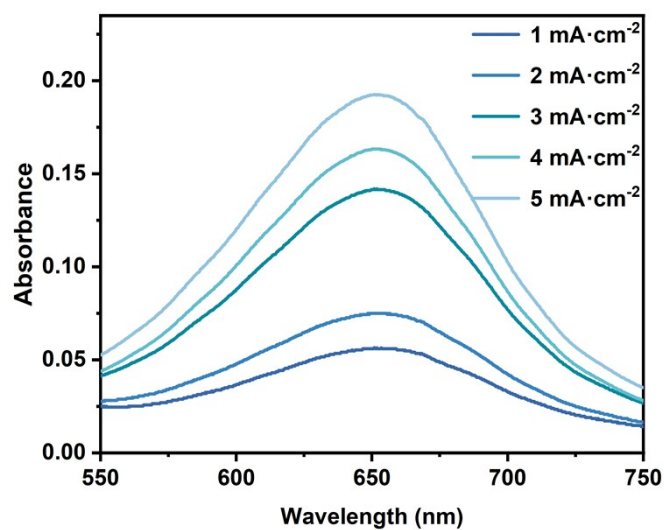

**Fig. S5.** UV-vis absorption spectra at different currents.

**Table 1. Comparison of Ti<sub>3</sub>C<sub>2</sub> QDs/Cu NWs and reported NORR performance**

| Catalyst                                     | Electrolyte                              | Potential<br>(V vs.<br>RHE) | NH <sub>3</sub> yield                             | FE (%) | Ref.         |
|----------------------------------------------|------------------------------------------|-----------------------------|---------------------------------------------------|--------|--------------|
| Ti <sub>3</sub> C <sub>2</sub> QDs/Cu<br>NWs | 0.1 M K <sub>2</sub> SO <sub>4</sub>     | -0.4                        | 5346.30 μg·h <sup>-1</sup> ·mg <sup>-1</sup><br>1 | 95.50  | This<br>work |
| Ni <sub>2</sub> P/CP                         | 0.1 M HCl                                | -0.2                        | 33.47 μmol·h <sup>-1</sup> ·cm <sup>-2</sup><br>2 | 76.9   | 1            |
| Ru <sub>0.05</sub> Cu <sub>0.95</sub>        | 0.5M Na <sub>2</sub> SO <sub>4</sub>     | -0.49                       | 17.68 μmol·cm <sup>-2</sup> ·h <sup>-1</sup><br>1 | 64.9   | 2            |
| CoP/TM                                       | 0.2 M<br>Na <sub>2</sub> SO <sub>4</sub> | -0.2                        | 47.22 μmol·h <sup>-1</sup> ·cm <sup>-2</sup><br>2 | 88.3   | 3            |
| FeP/CC                                       | 0.2 M PBS                                | -0.2                        | 85.62 μmol·h <sup>-1</sup> ·cm <sup>-2</sup><br>2 | 88.49  | 4            |
| Cu/P-TiO <sub>2</sub>                        | 0.1 M K <sub>2</sub> SO <sub>4</sub>     | -0.3                        | 3520.80 μg·h <sup>-1</sup> ·mg <sup>-1</sup><br>1 | 86.49  | 5            |
| Cu-Ti hollow<br>fiber                        | 0.05M<br>Na <sub>2</sub> SO <sub>4</sub> | -0.6                        | 400 μmol·h <sup>-1</sup> ·cm <sup>-2</sup>        | 90     | 6            |
| NiNC@CF                                      | 0.5 M PBS                                | -0.5                        | 94 μmol·h <sup>-1</sup> ·cm <sup>-2</sup>         | 87     | 7            |
| HCNF/CP                                      | 0.2 M<br>Na <sub>2</sub> SO <sub>4</sub> | -0.6                        | 22.35 μmol·h <sup>-1</sup> ·cm <sup>-2</sup><br>2 | 88.33  | 8            |
| Ni@NC                                        | 0.1 M HCl                                | 0.16                        | 34.6 μmol·cm <sup>-2</sup> ·h <sup>-1</sup>       | 72.3   | 9            |

|                                                 |                                                                                 |           |                                              |       |    |
|-------------------------------------------------|---------------------------------------------------------------------------------|-----------|----------------------------------------------|-------|----|
| NiO/TM                                          | 0.1 M<br>Na <sub>2</sub> SO <sub>4</sub> +0.05<br>mM Fe <sup>2+</sup> -<br>EDTA | -0.6      | 2130 μg·h <sup>-1</sup> ·cm <sup>-2</sup>    | 90    | 10 |
| MoS <sub>2</sub> /GF                            | 0.1 M HCl +<br>0.5 mM Fe<br>(II)SB                                              | -0.7/0.1  | 99.6 μmol·cm <sup>-2</sup> ·h <sup>-1</sup>  | 76.6  | 11 |
| a-B <sub>2.6</sub> C @<br>TiO <sub>2</sub> / Ti | 0.1 M<br>Na <sub>2</sub> SO <sub>4</sub> + 0.5<br>mM Fe <sup>2+</sup> -<br>EDTA | -0.9      | 3678.6 μg·h <sup>-1</sup> ·cm <sup>-2</sup>  | 87.6  | 12 |
| Bi NDs/CP                                       | 0.1 M<br>Na <sub>2</sub> SO <sub>4</sub> +<br>0.05 mM<br>Fe(II)EDT A            | -0.50     | 1194 μg·h <sup>-1</sup> ·mg <sup>-1</sup>    | 89.2  | 13 |
| Bi@C                                            | 0.1 M<br>Na <sub>2</sub> SO <sub>4</sub> +<br>0.05 mM<br>Fe(II)EDTA             | -0.7/-0.4 | 1592.5 μg·h <sup>-1</sup> ·mg <sup>-1</sup>  | 93    | 14 |
| Ru-LCN                                          | 0.5 M<br>Na <sub>2</sub> SO <sub>4</sub>                                        | -0.2      | 45.02 μmol·mg <sup>-1</sup> ·h <sup>-1</sup> | 65.96 | 15 |
| Fe/C                                            | 0.5 M PBS                                                                       | —         | 908 μmol·cm <sup>-2</sup> ·h <sup>-1</sup>   | 77    | 16 |

|         |                                     |      |                                                  |            |    |
|---------|-------------------------------------|------|--------------------------------------------------|------------|----|
|         | 0.5M H <sub>2</sub> SO <sub>4</sub> | —    | 1239μmol·cm <sup>-2</sup> ·h <sup>-1</sup>       | 50.4       |    |
| MoC/NCS | 0.1 M HCl                           | -0.8 | 1350±15μg·cm <sup>-2</sup> ·h <sup>-1</sup><br>1 | 89%±2<br>% | 17 |

## References

1. T. Mou, J. Liang, Z. Ma, L. Zhang, Y. Lin, T. Li, Q. Liu, Y. Luo, Y. Liu, S. Gao, H. Zhao, A. M. Asiri, D. Ma and X. Sun, High-efficiency electrohydrogenation of nitric oxide to ammonia on a Ni<sub>2</sub>P nanoarray under ambient conditions, *Journal of Materials Chemistry A*, 2021, **9**, 24268-24275.
2. J. Shi, C. Wang, R. Yang, F. Chen, N. Meng, Y. Yu and B. Zhang, Promoting nitric oxide electroreduction to ammonia over electron-rich Cu modulated by Ru doping, *Science China Chemistry*, 2021, **64**, 1493-1497.
3. J. Liang, W.-F. Hu, B. Song, T. Mou, L. Zhang, Y. Luo, Q. Liu, A. A. Alshehri, M. S. Hamdy, L.-M. Yang and X. Sun, Efficient nitric oxide electroreduction toward ambient ammonia synthesis catalyzed by a CoP nanoarray, *Inorganic Chemistry Frontiers*, 2022, **9**, 1366-1372.
4. J. Liang, Q. Zhou, T. Mou, H. Chen, L. Yue, Y. Luo, Q. Liu, M. S. Hamdy, A. A. Alshehri, F. Gong and X. Sun, FeP nanorod array: A high-efficiency catalyst for electroreduction of NO to NH<sub>3</sub> under ambient conditions, *Nano Research*, 2022, **15**, 4008-4013.
5. L. Chen, W. Sun, Z. Xu, M. Hao, B. Li, X. Liu, J. Ma, L. Wang, C. Li and W. Wang, Ultrafine Cu nanoparticles decorated porous TiO<sub>2</sub> for high-efficient electrocatalytic reduction of NO to synthesize NH<sub>3</sub>, *Ceramics International*, 2022, **48**, 21151-21161.
6. P. M. Krzywda, A. Paradelo Rodríguez, N. E. Benes, B. T. Mei and G. Mul, Effect of Electrolyte and Electrode Configuration on Cu-Catalyzed Nitric Oxide Reduction to Ammonia, *ChemElectroChem*, 2022, **9**, e202101273.
7. T. Muthusamy, S. Sethuram Markandaraj and S. Shanmugam, Nickel nanoparticles wrapped in N-doped carbon nanostructures for efficient electrochemical reduction of NO to NH<sub>3</sub>, *Journal of Materials Chemistry A*, 2022, **10**, 6470-6474.
8. L. Ouyang, Q. Zhou, J. Liang, L. Zhang, L. Yue, Z. Li, J. Li, Y. Luo, Q. Liu, N. Li, B. Tang, A. Ali Alshehri, F. Gong and X. Sun, High-efficiency NO electroreduction to NH<sub>3</sub> over honeycomb carbon nanofiber at ambient conditions, *J Colloid Interface Sci*, 2022, **616**, 261-267.
9. S. Sethuram Markandaraj, T. Muthusamy and S. Shanmugam, Electrochemical Reduction of Nitric Oxide with 1.7% Solar-to-Ammonia Efficiency Over Nanostructured Core-Shell Catalyst at Low Overpotentials, *Advanced Science*, 2022, **9**.
10. P. Liu, J. Liang, J. Wang, L. Zhang, J. Li, L. Yue, Y. Ren, T. Li, Y. Luo, N. Li, B. Tang, Q. Liu, A. M. Asiri, Q. Kong and X. Sun, High-performance NH<sub>3</sub> production via NO electroreduction over a NiO nanosheet array, *Chem Commun*, 2021, **57**, 13562-13565.

11. L. Zhang, J. Liang, Y. Wang, T. Mou, Y. Lin, L. Yue, T. Li, Q. Liu, Y. Luo, N. Li, B. Tang, Y. Liu, S. Gao, A. A. Alshehri, X. Guo, D. Ma and X. Sun, High-Performance Electrochemical NO Reduction into NH<sub>3</sub> by MoS<sub>2</sub> Nanosheet, *Angew Chem Int Ed Engl*, 2021, **60**, 25263-25268.
12. J. Liang, P. Liu, Q. Li, T. Li, L. Yue, Y. Luo, Q. Liu, N. Li, B. Tang, A. A. Alshehri, I. Shakir, P. O. Agboola, C. Sun and X. Sun, Amorphous Boron Carbide on Titanium Dioxide Nanobelt Arrays for High-Efficiency Electrocatalytic NO Reduction to NH<sub>3</sub>, *Angew Chem Int Ed Engl*, 2022, **61**, e202202087.
13. Y. Lin, J. Liang, H. Li, L. Zhang, T. Mou, T. Li, L. Yue, Y. Ji, Q. Liu, Y. Luo, N. Li, B. Tang, Q. Wu, M. S. Hamdy, D. Ma and X. Sun, Bi nanodendrites for highly efficient electrocatalytic NO reduction to NH<sub>3</sub> at ambient conditions, *Materials Today Physics*, 2022, **22**, 100611.
14. Q. Liu, Y. Lin, L. Yue, J. Liang, L. Zhang, T. Li, Y. Luo, M. Liu, J. You, A. A. Alshehri, Q. Kong and X. Sun, Bi nanoparticles/carbon nanosheet composite: A high-efficiency electrocatalyst for NO reduction to NH<sub>3</sub>, *Nano Research*, 2022, **15**, 5032-5037.
15. Y. Li, C. Cheng, S. Han, Y. Huang, X. Du, B. Zhang and Y. Yu, Electrocatalytic Reduction of Low-Concentration Nitric Oxide into Ammonia over Ru Nanosheets, *ACS Energy Letters*, 2022, **7**, 1187-1194.
16. S. Cheon, W. J. Kim, D. Y. Kim, Y. Kwon and J.-I. Han, Electro-synthesis of Ammonia from Dilute Nitric Oxide on a Gas Diffusion Electrode, *ACS Energy Letters*, 2022, **7**, 958-965.
17. G. Meng, M. Jin, T. Wei, Q. Liu, S. Zhang, X. Peng, J. Luo and X. Liu, MoC nanocrystals confined in N-doped carbon nanosheets toward highly selective electrocatalytic nitric oxide reduction to ammonia, *Nano Research*, 2022, **15**, 8890-8896.
